# Supplementary material for: Assessment of Structural and Functional Abnormalities of the Myocardium and the Ascending Aorta in Fetus with Hypoplastic Left Heart Syndrome
Source: Biomed Res Int. 2016 Feb 15;2016:2616729. doi: 10.1155/2016/2616729 (PMC4770132; doi:10.1155/2016/2616729)
Supplement: Supplementary file 1 — Video 1: Doppler color flow image in the aortic arch view demonstrating a ductus arteriosus-dependent retrograde flow in the transverse aortic arch (white arrow). Video 2: Doppler color flow image in a 4-chamber view demonstrating mitral atresia without blood filling, while blood flow filling normally through the tricuspid during diastole. [file 2616729.f1.zip]

Archive with 2 entries (2 files):
- mat.2616729.v1.avi
- Video 2.avi
